# Supplementary material for: Human plague system associated with rodent diversity and other environmental factors
Source: PubMed Central journal article supplement (PMC6599787; doi:10.1098/rsos.190216), 2019-06-19
Supplement: rsos190216supp1.pdf [file rsos190216supp1.pdf]

1 **Electronic supplementary material for**

2  
3 Human plague system associated with rodent diversity and other  
4 environmental factors

5  
6 Zhe Sun<sup>a,b,1</sup>, Lei Xu<sup>a,b,c,1</sup>, Boris V. Schmid<sup>b</sup>, Katharine R. Dean<sup>b</sup>, Zhibin Zhang<sup>d</sup>, Yan Xie<sup>d</sup>,  
7 Xiye Fang<sup>c</sup>, Shuchun Wang<sup>c</sup>, Qiyong Liu<sup>c</sup>, Baolei Lyu<sup>a</sup>, Xinru Wan<sup>d</sup>, Jianguo Xu<sup>c,\*</sup>, Nils  
8 Chr. Stenseth<sup>a,b,\*</sup>, and Bing Xu<sup>a,\*</sup>

9 <sup>a</sup>Ministry of Education Key Laboratory for Earth System Modeling, Department of Earth  
10 System Science, Tsinghua University, Beijing 100084, P. R. China;

11 <sup>b</sup>Centre for Ecological and Evolutionary Synthesis (CEES), Department of Biosciences,  
12 University of Oslo, N-0316 Oslo, Norway;

13 <sup>c</sup>State Key Laboratory of Infectious Disease Prevention and Control, National Institute for  
14 Communicable Disease Control and Prevention, Chinese Center for Disease Control and  
15 Prevention, Changping, Beijing 102206, P. R. China;

16 <sup>d</sup>State Key Laboratory of Integrated Management on Pest Insects and Rodents, Institute of  
17 Zoology, Chinese Academy of Sciences, Beijing 100101, P. R. China

18 <sup>1</sup>Z.S. and L.X. contributed equally to this work.

19 \*Corresponding authors.

20  
21  
22 **This file includes:**

23  
24 Text  
25 Figures. S1 to S8  
26 Tables S1 to S4  
27 References for electronic supplementary material

28 **Text**

29 **1. Average human plague intensity and human population data in China**

30 The first appearance of plague differed among regions [1] and plague outbreaks were often  
31 discontinuous, with years of stasis in recorded cases [2]. Thus, we calculated the average  
32 plague intensity as the average number of annual human cases when plague occurred  
33 (equation 1 in main text).

34 We used the average human population during the presence years for grids with cases and  
35 average human population during 1772 to 1964 for grids without plague cases. This is  
36 because the plague appearance were different in time among different grids. We adjusted  
37 the human population for grids with plague in case there was a huge change in the grid  
38 population from 1772 to 1964. Additionally, we get a better BIC (Bayesian information  
39 criterion, accounting by logE in zero-inflated GAM [3]) when we used the different human  
40 population for grids with and without cases.

41 **2. Species distribution data in China**

42 The database compiled by Xie *et al.* [4] is an aggregation of species distributions from  
43 different regions and historical periods (beginning in 1758, see figure S2). We used the  
44 whole dataset of the species distribution to calculate species richness, in order to ensure  
45 the spatial integrity.

46 A correlation test was done to examine the data stability in different periods (Table S1) and  
47 from different sources. We calculated the correlation coefficients between diversity based  
48 on the subsets of the dataset and the whole dataset [4]. We split the dataset by number of  
49 records and also truncated a subset by using the peak period of plague (1890 – 1950) in  
50 China [5]. We also tested the correlation between the species richness based on an animal  
51 distribution survey in 1996 [6] and the aggregated dataset [4]. Table S1 showed that the  
52 correlation coefficients were relatively stable, which reflected that the species distribution  
53 pattern from different periods and sources was relatively stable.

### 54 **3. Plague hosts in China**

55 There are 88 species of known plague hosts in China based on field surveys of naturally  
56 infected animals and etiological studies [7-9]. The plague hosts are identified based on field  
57 surveys of naturally infected animals after 1945, with the criteria of plague infection  
58 existing in the host populations [9]. After the field surveys, both animal serological  
59 examinations (seroprevalence) and bacteriological examinations (detection of *Yersinia*  
60 *pestis*) were conducted to confirm plague hosts. There are plenty of literatures related to  
61 this issue in China, such as Wu *et al.* [10], Li *et al.* [11], Ping [12] and Liu [13]. By  
62 combining field surveys and etiological studies, these 88 species are thought to be involved  
63 in plague ecosystems and transmission in China, in other words, they have the ability to  
64 transmit plague to human [9]. The detailed information of known rodent plague hosts in  
65 China was listed in Table S2.

### 66 **4. Model results**

67 In model with the species richness of all terrestrial vertebrates (model *i*), the annual  
68 precipitation was deleted in backward model selection. We found the species richness of  
69 terrestrial vertebrates presented a non-significant association with both plague presence  
70 and intensity ( $p > 0.05$ ). The human population size in grids exhibited a positive  
71 relationship with both plague presence ( $\chi^2_{1.94, 5.48} = 32.28; p < 0.01$ ) and intensity ( $F_{1.00, 4.00}$   
72  $= 34.37; p < 0.01$ ). There was a positive relationship between plague presence and the local  
73 transportation connectivity ( $\chi^2_{1.55, 5.48} = 10.53; p < 0.05$ ), but a non-significant result  
74 between transportation and plague intensity ( $p > 0.05$ ).

75 In model with the species richness of all mammals (model *ii*), we found the species richness  
76 of mammals had a positive association with plague presence ( $\chi^2_{1.00, 7.13} = 7.27; p < 0.01$ )  
77 but a non-significant relationship with intensity ( $p > 0.05$ ). Annual precipitation reflected  
78 a positive relationship with plague presence ( $\chi^2_{1.89, 7.13} = 8.97; p < 0.05$ ) but a non-  
79 significant relationship with plague intensity ( $p > 0.05$ ). The human population size in grids  
80 exhibited a positive relationship with both plague presence ( $\chi^2_{1.92, 7.13} = 33.55; p < 0.01$ )  
81 and plague intensity ( $F_{1.00, 5.00} = 21.39; p < 0.01$ ). There was a positive relationship between

82 plague presence and the local transportation connectivity ( $\chi^2_{1.32, 7.13} = 9.35$ ;  $p < 0.05$ ), but a  
83 non-significant result between transportation and plague intensity ( $p > 0.05$ ).

84 In the model with the species richness of rodents (model *iii*), the species richness of rodents  
85 had a positive association with plague presence ( $\chi^2_{1.81, 7.56} = 21.84$ ;  $p < 0.01$ ) and a non-  
86 significant association with plague intensity ( $p > 0.05$ ). Annual precipitation reflected a  
87 non-significant relationship with plague presence and plague intensity ( $p > 0.05$ ). The  
88 human population size in grids exhibited a positive relationship with plague presence ( $\chi^2_{1.91,$   
89  $7.56} = 32.16$ ;  $p < 0.01$ ) and plague intensity ( $F_{1.21, 5.22} = 16.38$ ;  $p < 0.01$ ). There was a positive  
90 relationship between plague presence and the local transportation connectivity ( $\chi^2_{1.00, 7.56} =$   
91  $5.70$ ;  $p < 0.05$ ), but a non-significant result between transportation and plague intensity ( $p >$   
92  $0.05$ ).

93 In the model with the species richness of known plague hosts (model *iv*), the species  
94 richness of known plague hosts had a positive association with plague presence ( $\chi^2_{1.49, 7.27}$   
95  $= 27.55$ ;  $p < 0.01$ ) but a non-significant association with plague intensity ( $p > 0.05$ ). Annual  
96 precipitation reflected a positive relationship with plague presence ( $\chi^2_{1.86, 7.27} = 7.37$ ;  $p <$   
97  $0.05$ ) but a non-significant relationship with plague intensity ( $p > 0.05$ ). The human  
98 population size in grids exhibited a positive relationship with plague presence ( $\chi^2_{1.93, 7.27} =$   
99  $30.98$ ;  $p < 0.01$ ) and plague intensity ( $F_{1.00, 6.14} = 18.50$ ;  $p < 0.01$ ). There was a positive  
100 relationship between plague presence and the local transportation connectivity ( $\chi^2_{1.00, 7.27} =$   
101  $7.70$ ;  $p < 0.01$ ), but a non-significant result between transportation and plague intensity ( $p >$   
102  $0.05$ ).

103 In the model with the species richness of wild rodent plague hosts (model *vi*), the species  
104 richness of wild rodents was positively associated with plague presence ( $\chi^2_{1.87, 7.60} = 43.07$ ;  
105  $p < 0.01$ ; figure S6A), but not with plague intensity in humans ( $p > 0.05$ ; figure S6E). In  
106 this model, the precipitation levels had a positive association with both plague presence  
107 ( $\chi^2_{1.81, 7.60} = 10.33$ ;  $p < 0.01$ ; figure S6B) and intensity ( $F_{1.56, 5.56} = 4.45$ ;  $p < 0.05$ ; figure  
108 S6F), as did local human population size (for presence:  $\chi^2_{1.91, 7.60} = 27.18$ ;  $p < 0.01$ ; figure  
109 S6C; for intensity:  $F_{1.00, 5.56} = 15.63$ ;  $p < 0.01$ ; figure S6G). The local transportation  
110 connectivity showed a positive relationship for plague presence ( $\chi^2_{1.00, 7.60} = 5.78$ ;  $p < 0.05$ ;

111 figure S6D), and a non-significant positive association with plague intensity ( $p > 0.05$ ;  
112 figure S6H).

113 In the model with the species richness of commensal rodent plague hosts (model *vii*), the  
114 transportation connectivity was deleted by backward model selection. We found that the  
115 species richness of commensal rodent plague hosts was positively associated with both  
116 plague presence ( $\chi^2_{1.88, 6.73} = 20.77$ ;  $p < 0.01$ ; figure S6I) and plague intensity ( $F_{1.00, 4.36} =$   
117  $5.30$ ;  $p < 0.05$ ; figure S6L). Annual precipitation reflected a positive relationship with  
118 plague presence ( $\chi^2_{1.92, 6.73} = 11.09$ ;  $p < 0.01$ ; figure S6J) but a non-significant relationship  
119 with plague intensity ( $p > 0.05$ ; figure S6M). The human population size exhibited a  
120 positive relationship with both plague presence ( $\chi^2_{1.93, 6.73} = 37.70$ ;  $p < 0.01$ ; figure S6K)  
121 and intensity ( $F_{1.36, 4.36} = 21.55$ ;  $p < 0.01$ ; figure S6N).

122 We also tested model with the interaction of rodent plague host species richness and  
123 transportation connectivity. The formula is as follows,

$$124 P_i = B[\alpha + f_{15}(Rh_i) \times Trans_i + f_2(Prec_i) + f_3(Popu_i)] \times \exp[\beta + f_{16}(Rh_i) \times \\ 125 Trans_i + f_6(Prec_i) + f_7(Popu_i) + \varepsilon_i] \quad (S1)$$

126 The logE of model (S1) is -884.67, suggesting that keeping individual effect of species  
127 richness and transportation in model *v* (logE = -869.33) is better than adding the interaction  
128 term.

## 129 **5. Association strength and significance between diversity and human plague**

130 The best fitting model variant for predicting human plague presence and intensity was  
131 model (*v*), which considered the local species richness of rodent plague hosts. The mean  
132 and median of rodent plague host diversity in whole of China were 9.14 and 9, respectively.  
133 Using 9 as a threshold, we classified the grid cells in China into two categories, high-  
134 diversity (species richness of rodent plague hosts greater than 9) and low-diversity groups  
135 (species richness of rodent plague hosts less than or equal to 9). Then we tested the  
136 association strength and significance between species richness and human plague in these  
137 two groups using risk ratio (*RR*) [14] and *chi-square* test [15].

138 *RR* is defined as the ratio of plague presence in high-diversity group to low-diversity group,  
139 which can be regarded as a measure of the association strength. The frequency of plague  
140 presence (plague have occurred) and absence (plague never occurred) in high/low diversity  
141 grids was shown in Table S3. Based on Table S3, the ratio of plague presence in high-  
142 diversity group ( $R_h$ ) was 32.31%, while the ratio in low-diversity group ( $R_l$ ) was 12.86%.  
143 The overall ratio ( $R$ ) was 21.36% for all grids. *RR* was calculated using ‘*fmsb*’ package in  
144 R. Finally, *RR* was 2.51 (95%CI: 1.98–3.20;  $p < 0.01$ ), which illustrated that grids with  
145 high diversity of rodent plague hosts had 2.51 times the risk of plague presence compared  
146 to grids with low diversity.

147 We also tested the significance of the association using *chi-square* test [15]. The null  
148 hypothesis ( $H_0$ ) was that plague presence is not associated with rodent diversity. If the null  
149 hypothesis is true, the expected counts in each category (Table S4) calculated by using the  
150 overall ratio  $R$  would be close to the observed values. Otherwise, the null hypothesis is not  
151 valid under large  $\chi^2$ .

152  $\chi^2$  and its associated  $p$ -value are computed using *chisq.test* function in R, based on the  
153 expected and the observed values in Table S3 and Table S4.  $\chi^2$  was 60.88 ( $d.f. = 1$ ;  $p <$   
154 0.01) in our study. Thus, the null hypothesis is rejected. The result indicated a significant  
155 association between high rodent diversity and plague presence.

## 156 **6. Spatial sensitivity analysis**

157 In a sensitivity analysis where we merged our grid cells to  $2 \times 2$  degrees, we found the  
158 species richness of rodent plague hosts was still the best predictor of human plague risk (in  
159 both presence and intensity). In this coarser-scale model, the species richness of rodent  
160 plague hosts still had a positive association with both plague presence ( $\chi^2_{1.00, 5.17} = 13.88$ ;  $p$   
161  $< 0.01$ ; figure S5A) and intensity ( $F_{1.00, 5.00} = 5.62$ ;  $p < 0.05$ ; figure S5E). Annual  
162 precipitation reflected a non-significant relationship with plague presence ( $p > 0.05$ ; figure  
163 S5B) but a positive relationship with plague intensity ( $F_{1.00, 5.00} = 10.31$ ;  $p < 0.01$ ; figure  
164 S5F). The human population size exhibited a positive relationship with plague presence  
165 ( $\chi^2_{1.00, 5.17} = 5.76$ ;  $p < 0.05$ ; figure S5C) but a non-significant relationship with intensity ( $p >$   
166 0.05; figure S5G). The local transportation connectivity showed a non-significant

167 relationship for plague presence ( $p > 0.05$ ; figure S5D) but a positive association with  
168 plague intensity ( $F_{1.00, 5.00} = 5.75$ ;  $p < 0.05$ ; figure S5H).

## 169 **7. Validation of species richness association with human plague**

170 To investigate whether the results were sensitive to any changes in species richness during  
171 the recent half century of economic growth and change in China, we calculated the species  
172 richness of terrestrial vertebrates, mammals, rodents, known plague hosts, rodent plague  
173 hosts, commensal rodent plague hosts and wild rodent plague hosts using only the species  
174 distribution records from before 1964. We further replaced the diversity in main text by  
175 diversity calculated by truncated records before 1964 (examples in figure S3B and figure  
176 S3C). We found that species richness of rodent plague hosts before 1964 had the largest  
177 logE compared with other diversity. We also found that the species richness of rodent  
178 plague hosts before 1964 had a positive association with both the human plague presence  
179 ( $\chi^2_{1.84, 6.35} = 12.71$ ;  $p < 0.01$ ) and intensity ( $F_{1.00, 5.32} = 8.01$ ;  $p < 0.01$ ). These results  
180 strengthened the confidence of our findings.

## 181 **8. Transportation validation**

182 Railways in late 19<sup>th</sup> century were derived from Wang *et al.* [16]. We used roads in the  
183 historical map [17] as the representative main roads in 19<sup>th</sup> century, because the main road  
184 structure was relatively developed in Qing Dynasty and may be relatively stable since then  
185 [18]. We subsequently calculated the total length of railways and roads in one-degree grids  
186 covering China.

187 In the model with transportation connectivity in 19<sup>th</sup> century, we found the species richness  
188 of rodent plague hosts had a positive association with plague presence ( $\chi^2_{1.89, 7.82} = 39.05$ ;  
189  $p < 0.01$ ) and intensity ( $F_{1.00, 5.76} = 6.04$ ;  $p < 0.05$ ). Annual precipitation reflected a positive  
190 relationship with plague presence ( $\chi^2_{1.88, 7.82} = 8.41$ ;  $p < 0.05$ ) and a non-significant  
191 association with intensity ( $p > 0.05$ ). The local human population size exhibited a positive  
192 relationship with plague presence ( $\chi^2_{1.92, 7.82} = 30.02$ ;  $p < 0.01$ ) and intensity ( $F_{1.42, 5.76} =$   
193  $13.06$ ;  $p < 0.01$ ). The transportation connectivity showed a non-significant positive  
194 association with plague presence and intensity (presence:  $p < 0.1$ ).

195 **Figure S1. Zero-inflation test of log-transformed average plague intensity in China.**

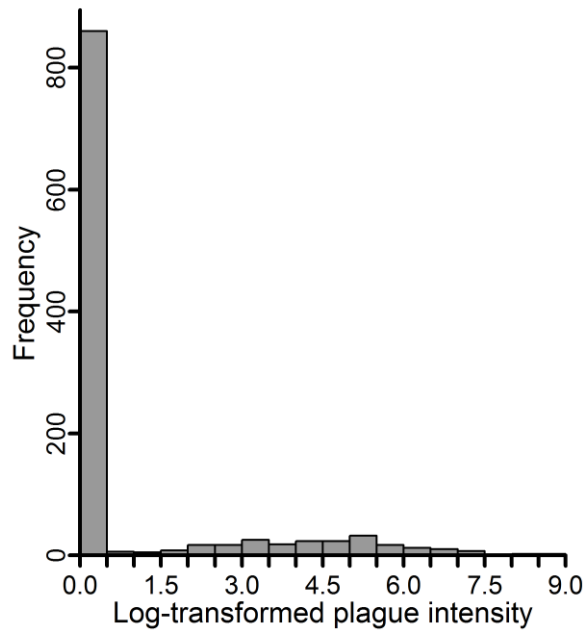

196



197 **Figure S2. Histogram of the number of records in the species distribution data in**  
198 **China.**  
199

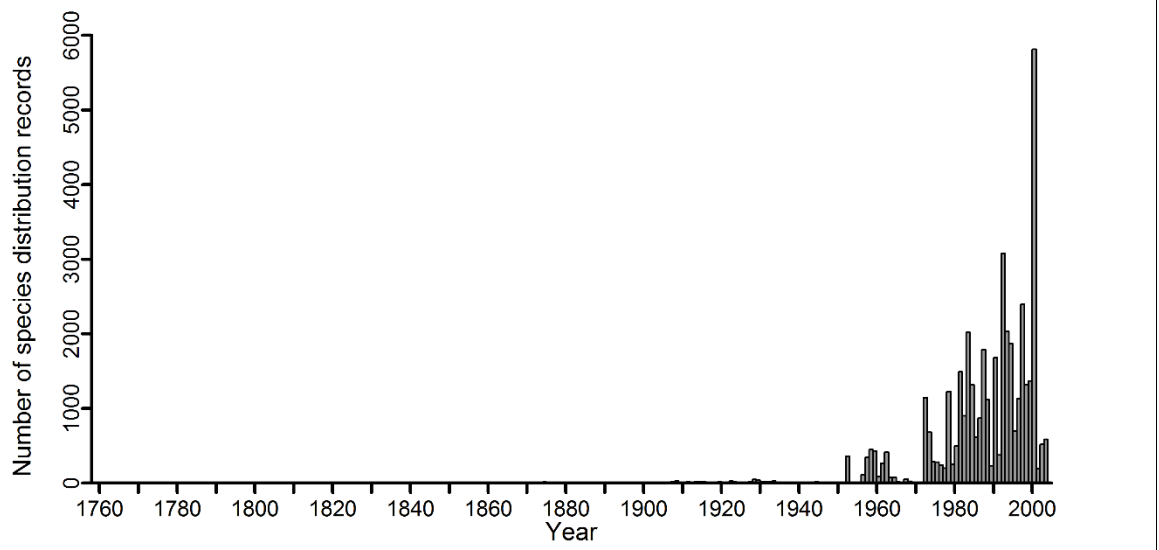

200

201 **Figure S3. Spatial distribution of species richness in mainland China.** (A) Species  
202 richness of terrestrial vertebrates. (B) Species richness of terrestrial vertebrates, using  
203 species distribution records before 1964. (C) Species richness of rodents, using species  
204 distribution records before 1964.

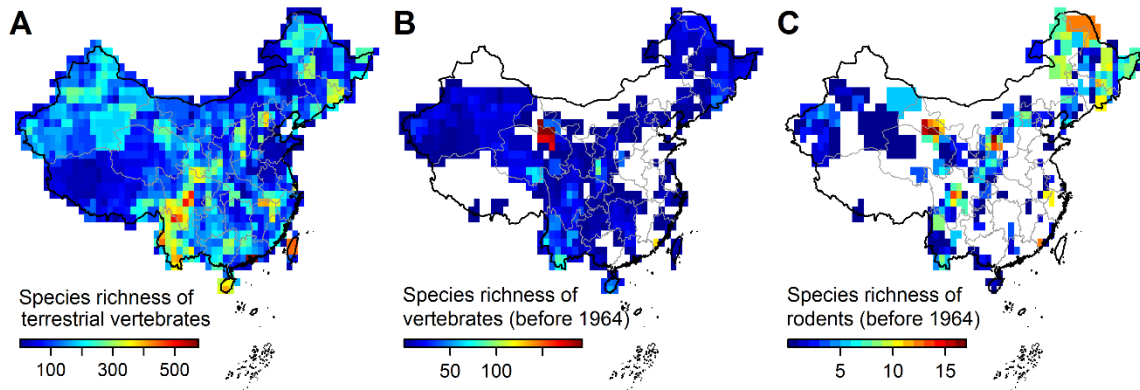

205

206 **Figure S4. Semi-variogram of model residuals.** The x-axis is the grid distance and the  
207 y-axis is the semi-variance. These plots indicate that there is some spatial correlation in the  
208 residuals between adjacent grid cells, with a semi-variogram score of 0.76-0.79 between  
209 plots A-C. **(A)** Model *v*. **(B)** Model *vi*. **(C)** Model *vii*.

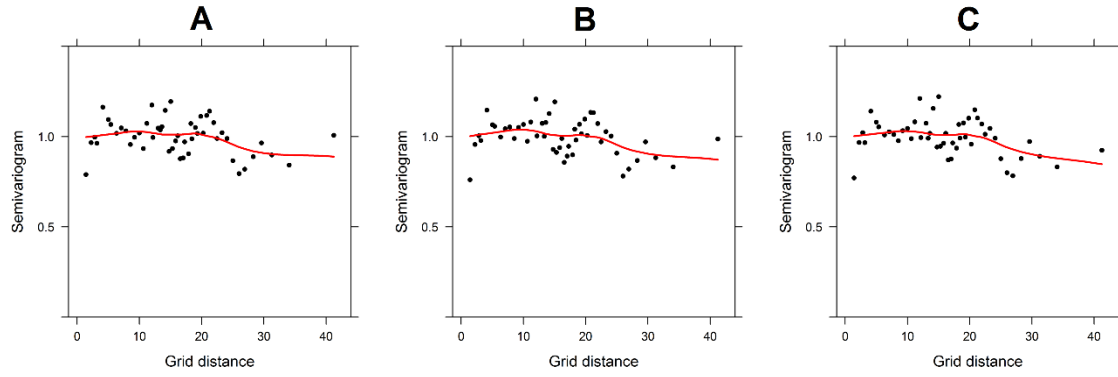

210

211 **Figure S5. Spatial sensitivity analysis of model ( $\nu$ ) with species richness of rodent**  
 212 **plague hosts by merging grids to 2-degree grids. (A-D) The binomial part quantifies the**  
 213 **presence of plague. (E-H) The lognormal part evaluates the positive plague intensity.**

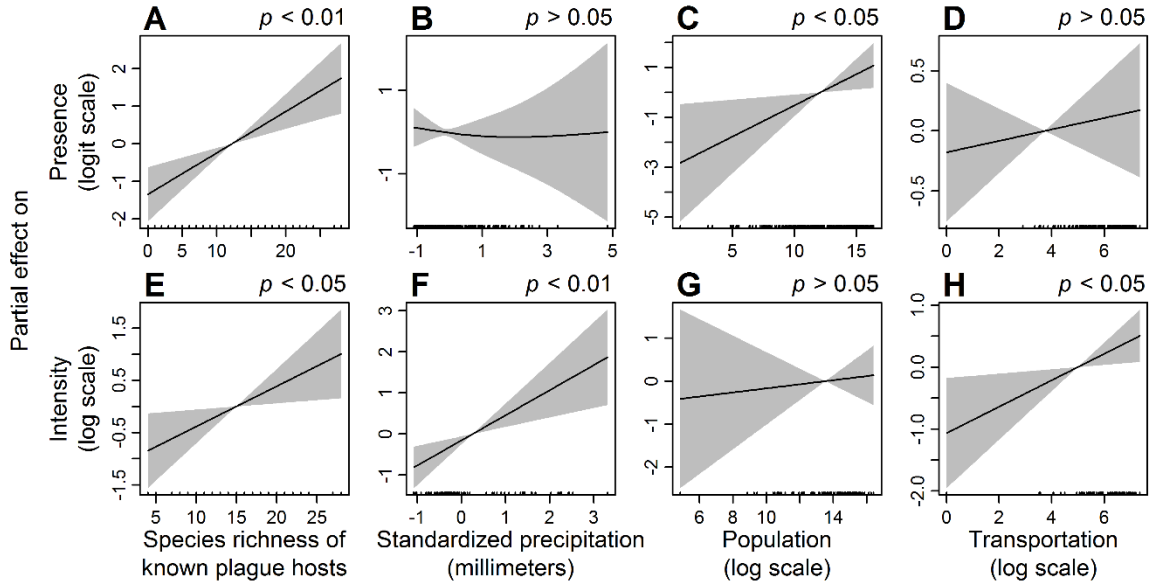

214

215 **Figure S6. Partial effects of additive parts on human plague presence and intensity of**  
 216 **the model (vi) with species richness of wild rodent plague hosts, and model (vii) with**  
 217 **species richness of commensal rodent plague hosts. (A-H) Results of model with species**  
 218 **richness of wild rodent plague hosts, where (A-D) quantify the presence of plague and (E-H)**  
 219 **H) evaluate the positive plague intensity. (I-N) Results of model with species richness of**  
 220 **commensal rodent plague hosts, where (I-K) quantify the presence of plague and (L-N)**  
 221 **evaluate the positive plague intensity.**

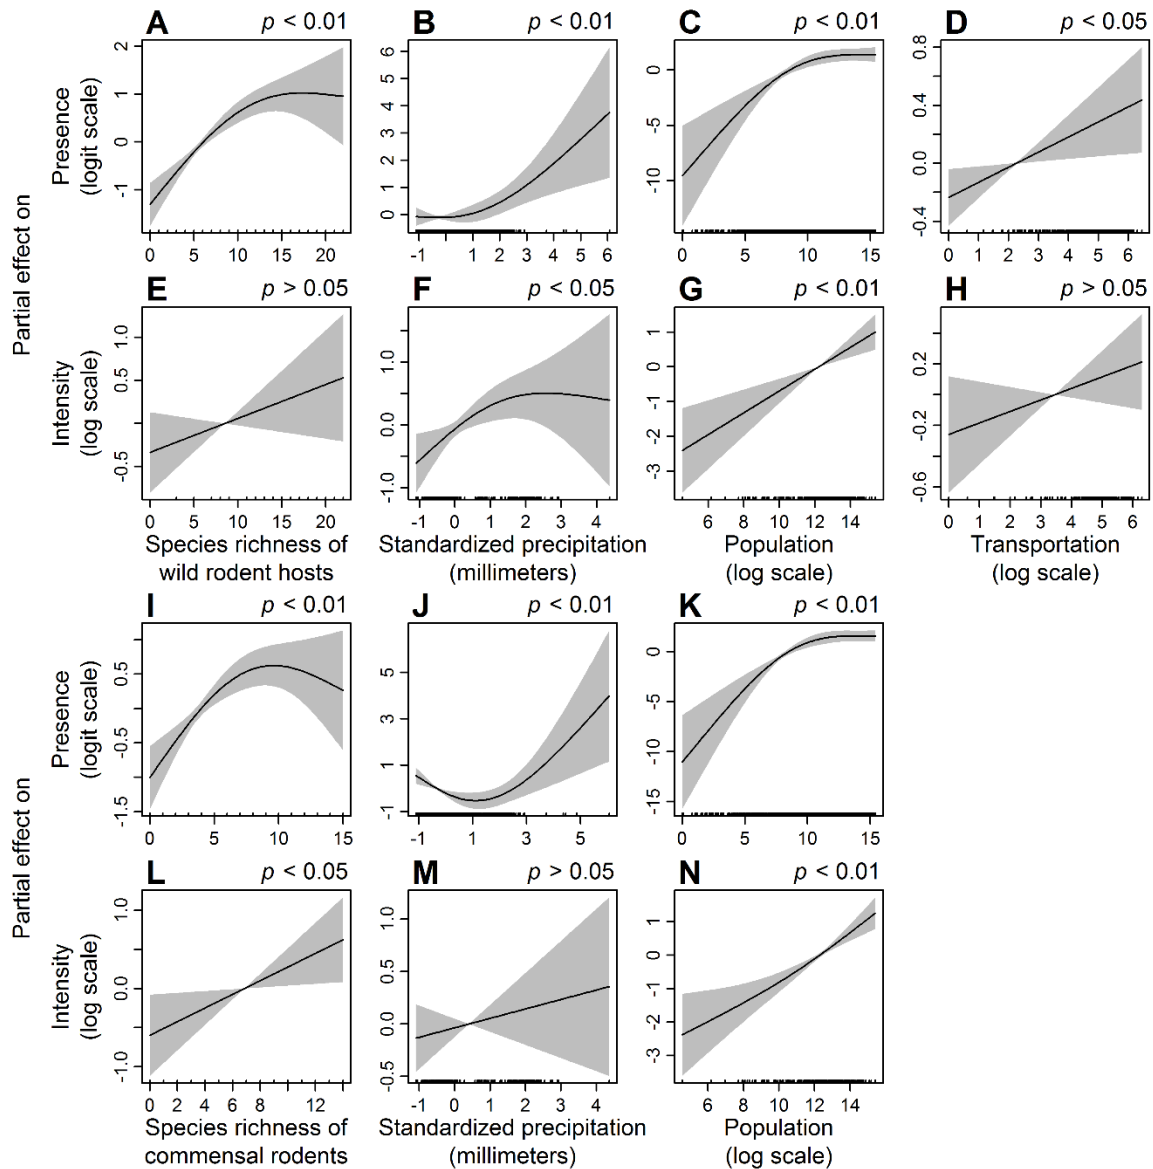

222

223 **Figure S7. The proportion of species richness of wild/commensal rodent plague hosts**  
224 **to rodent plague hosts in mainland China. (A) Ratio of wild rodent hosts to all rodent**  
225 **plague hosts. (B) Ratio of commensal rodent hosts to all rodent plague hosts. The dotted**  
226 **line in figures refers to the Heihe – Tengchong Line [19] which is a demarcation based on**  
227 **the distribution of human population in China. (C) Locations of infected villages in China**  
228 **during the Third Pandemic and central part of China.**  
229

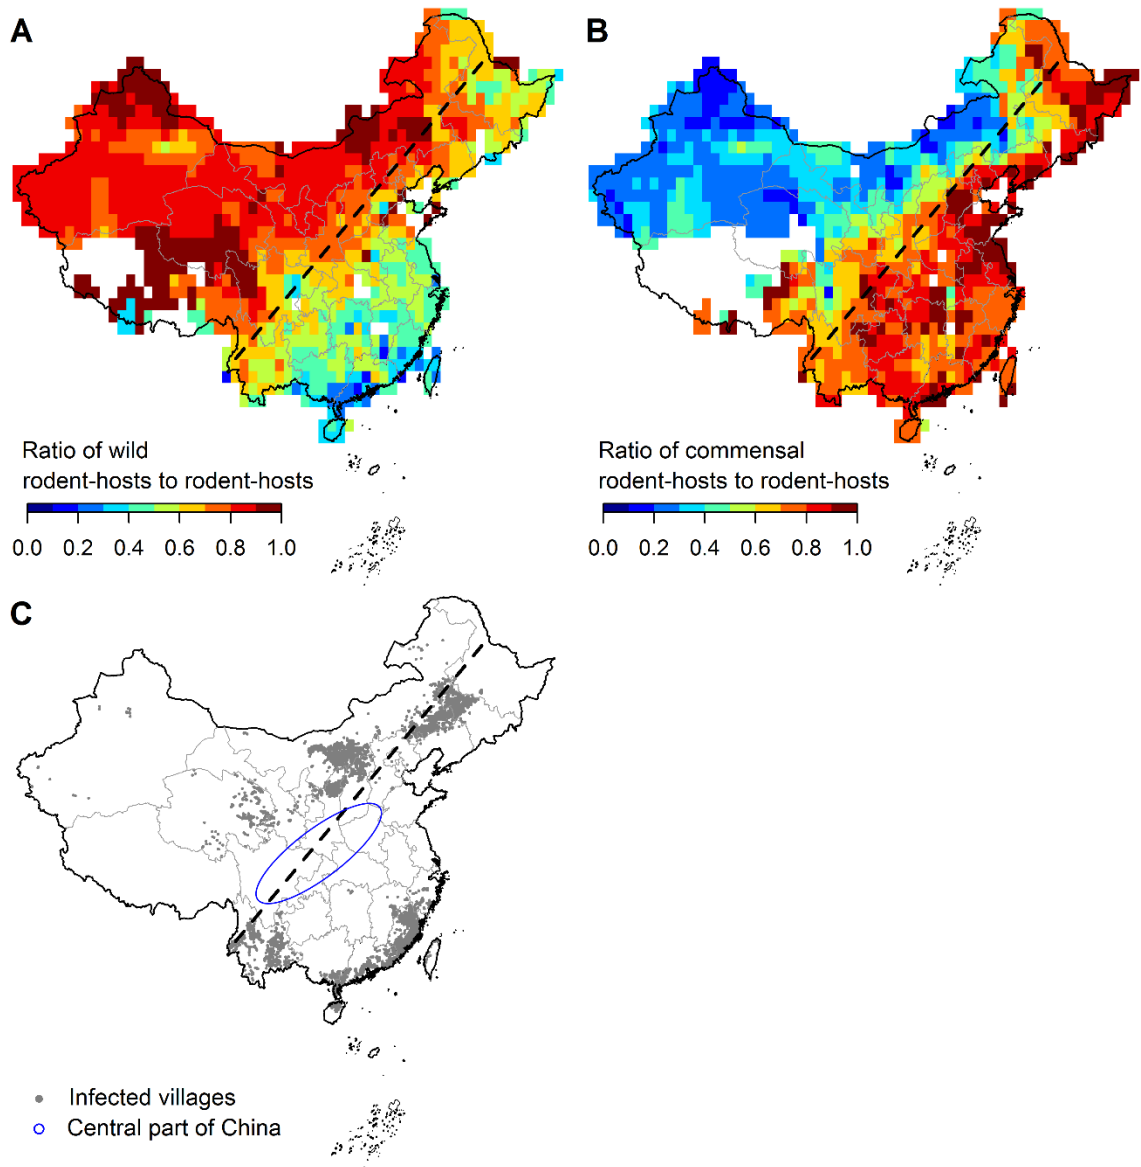

230

231 **Figure S8. Transportation routes in late 19<sup>th</sup> century.**

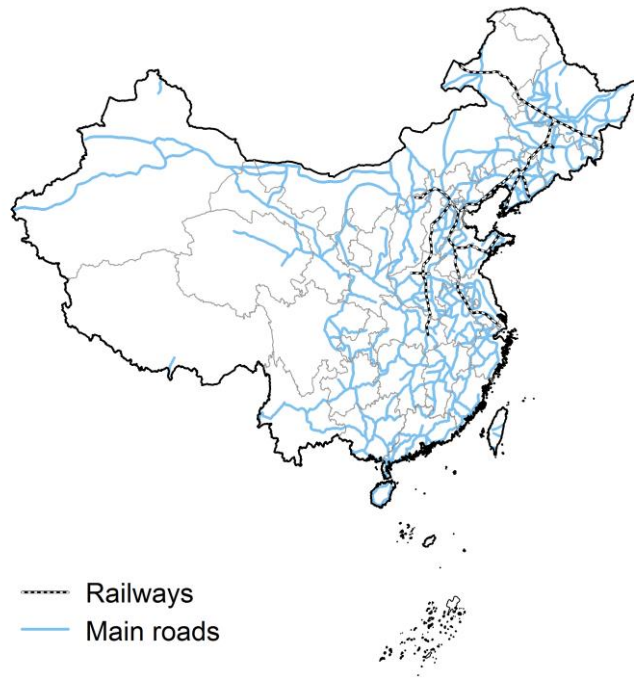

232

233

234 **Table S1. Correlation test between terrestrial vertebrate diversity in different periods**  
235 **and the terrestrial vertebrate diversity of the whole dataset.** Species diversity in 1996  
236 was calculated based on an animal distribution survey.

| ID | Time period | Number of records | Correlation coefficient |
|----|-------------|-------------------|-------------------------|
| 1  | 1890 - 1950 | 544               | 0.31*                   |
| 2  | before 1983 | 10574             | 0.48*                   |
| 3  | 1983 - 1992 | 10006             | 0.43*                   |
| 4  | 1993 - 1998 | 11201             | 0.46*                   |
| 5  | 1999 - 2004 | 9806              | 0.39*                   |
| 6  | 1996        | 10905             | 0.50*                   |

237 \* Significant ( $p < 0.05$ ).



238 **Table S2. Lists of rodent plague hosts in China and classification of rodent plague**  
 239 **hosts according to their habitat.** Information of rodent habitats were derived from Yang  
 240 and Yan [20] and Pan *et al.* [21].

| No | Name                             | Habitats                             | Classification  |
|----|----------------------------------|--------------------------------------|-----------------|
| 1  | <i>Marmota baibacina</i>         | Prairie                              | Wild            |
| 2  | <i>Marmota caudata</i>           | Prairie                              | Wild            |
| 3  | <i>Marmota himalayana</i>        | Prairie                              | Wild            |
| 4  | <i>Marmota sibirica</i>          | Prairie                              | Wild            |
| 5  | <i>Sciurotamias forresti</i>     | Forest                               | Wild            |
| 6  | <i>Spermophilus alashanicus</i>  | Prairie, desert                      | Wild            |
| 7  | <i>Spermophilus dauricus</i>     | Prairie, desert                      | Wild            |
| 8  | <i>Spermophilus pallidicauda</i> | Prairie, desert                      | Wild            |
| 9  | <i>Spermophilus undulatus</i>    | Prairie, forest                      | Wild            |
| 10 | <i>Callosciurus erythraeus</i>   | Forest                               | Wild            |
| 11 | <i>Dremomys pernyi</i>           | Forest                               | Wild            |
| 12 | <i>Tamiops swinhoei</i>          | Forest                               | Wild            |
| 13 | <i>Allactaga sibirica</i>        | Prairie, desert                      | Wild            |
| 14 | <i>Cardiocranius paradoxus</i>   | Prairie, desert                      | Wild            |
| 15 | <i>Dipus sagitta</i>             | Desert, prairie                      | Wild            |
| 16 | <i>Stylodipus andrewsi</i>       | Desert                               | Wild            |
| 17 | <i>Myospalax aspalax</i>         | Prairie                              | Wild            |
| 18 | <i>Alticola argentatus</i>       | Prairie                              | Wild            |
| 19 | <i>Alticola semicanus</i>        | Prairie                              | Wild            |
| 20 | <i>Ellobius tancrei</i>          | Prairie, desert                      | Wild            |
| 21 | <i>Eolagurus przewalskii</i>     | Prairie, desert                      | Wild            |
| 22 | <i>Eothenomys miletus</i>        | Forest, farmland                     | Wild/Commensal  |
| 23 | <i>Lasiopodomys brandtii</i>     | Prairie                              | Wild            |
| 24 | <i>Lasiopodomys fuscus</i>       | Prairie                              | Wild            |
| 25 | <i>Microtus gregalis</i>         | Prairie                              | Wild            |
| 26 | <i>Microtus limnophilus</i>      | Prairie                              | Wild            |
| 27 | <i>Allocricetulus eversmanni</i> | Prairie, desert                      | Wild            |
| 28 | <i>Cricetulus barabensis</i>     | Prairie, desert, farmland            | Wild/ Commensal |
| 29 | <i>Cricetulus migratorius</i>    | Prairie, desert, forest,<br>farmland | Wild/ Commensal |
| 30 | <i>Phodopus campbelli</i>        | Desert, prairie                      | Wild            |
| 31 | <i>Phodopus roborovskii</i>      | Desert, prairie                      | Wild            |
| 32 | <i>Tscherskia triton</i>         | Farmland, prairie                    | Wild/ Commensal |
| 33 | <i>Meriones meridianus</i>       | Desert                               | Wild            |
| 34 | <i>Meriones unguiculatus</i>     | Prairie, farmland, desert            | Wild/ Commensal |
| 35 | <i>Rhombomys opimus</i>          | Desert                               | Wild            |

|    |                               |                     |                 |
|----|-------------------------------|---------------------|-----------------|
| 36 | <i>Apodemus agrarius</i>      | Farmland, forest    | Wild/ Commensal |
| 37 | <i>Apodemus chevrieri</i>     | Farmland, forest    | Wild/ Commensal |
| 38 | <i>Apodemus draco</i>         | Forest, farmland    | Wild/ Commensal |
| 39 | <i>Apodemus latronum</i>      | Forest, farmland    | Wild/ Commensal |
| 40 | <i>Apodemus peninsulae</i>    | Forest, farmland    | Wild/ Commensal |
| 41 | <i>Bandicota indica</i>       | Farmland            | Commensal       |
| 42 | <i>Micromys minutus</i>       | Farmland            | Commensal       |
| 43 | <i>Mus caroli</i>             | Farmland            | Commensal       |
| 44 | <i>Mus musculus</i>           | Residence, farmland | Commensal       |
| 45 | <i>Niviventer andersoni</i>   | Forest              | Wild            |
| 46 | <i>Niviventer confucianus</i> | Forest, farmland    | Wild/ Commensal |
| 47 | <i>Niviventer fulvescens</i>  | Forest, farmland    | Wild/ Commensal |
| 48 | <i>Rattus rattus</i>          | Residence, farmland | Commensal       |
| 49 | <i>Rattus losea</i>           | Farmland            | Commensal       |
| 50 | <i>Rattus nitidus</i>         | Residence, farmland | Commensal       |
| 51 | <i>Rattus norvegicus</i>      | Residence, farmland | Commensal       |
| 52 | <i>Rattus tanezumi</i>        | Residence, farmland | Commensal       |
| 53 | <i>Cavia porcellus</i>        | Residence           | Commensal       |
| 54 | <i>Myodes proditor</i>        | Forest              | Wild            |

---

242 **Table S3. The observational frequency of plague presence in high-diversity and low-**  
 243 **diversity grid cells.**

|                | <b>Presence of plague<br/>(number of grids)</b> | <b>Absence of plague<br/>(number of grids)</b> | <b>Sum</b> | <b>Ratio of plague<br/>presence</b> |
|----------------|-------------------------------------------------|------------------------------------------------|------------|-------------------------------------|
| High diversity | 158                                             | 331                                            | 489        | 32.31%                              |
| Low diversity  | 81                                              | 549                                            | 630        | 12.86%                              |
| Sum            | 239                                             | 880                                            | 1119       | 21.36%                              |

244

245 **Table S4. The expected frequency of plague presence in high-diversity and low-**  
 246 **diversity grid cells.**

|                | <b>Presence of plague<br/>(number of grids)</b> | <b>Absence of plague<br/>(number of grids)</b> |
|----------------|-------------------------------------------------|------------------------------------------------|
| High diversity | 104.45                                          | 384.55                                         |
| Low diversity  | 134.57                                          | 495.43                                         |

247

248 **Reference**

- 249 1. Xu L., Stige L.C., Kausrud K.L., Ari T.B., Wang S., Fang X., Schmid B.V., Liu Q.,  
 250 Stenseth N.C., Zhang Z. 2014 Wet climate and transportation routes accelerate spread of human  
 251 plague. *Proc Biol Sci* **281**(1780), 20133159. (doi:10.1098/rspb.2013.3159).
- 252 2. Institute of Epidemiology and Microbiology, Chinese Academy of Medical Sciences.  
 253 1980 *The History of Spread of Plague in China*. pp. 33-1794. Beijing, People's Medical  
 254 Publishing House.
- 255 3. Liu H., Chan K.-S. 2010 Introducing COZIGAM: an R package for unconstrained and  
 256 constrained zero-inflated generalized additive model analysis. *J Stat Softw* **35**(11), 1-26.  
 257 (doi:10.18637/jss.v035.i11).
- 258 4. Xie Y., Zhang S., Wang W. 2009 *Geographical Atlas of Biodiversity in China*. pp. 1-246.  
 259 Changsha, Hunan Education Press.
- 260 5. Ben-Ari T., Neerinckx S., Agier L., Cazelles B., Xu L., Zhang Z., Fang X., Wang S., Liu  
 261 Q., Stenseth N.C. 2012 Identification of Chinese plague foci from long-term epidemiological  
 262 data. *Proc Natl Acad Sci USA* **109**(21), 8196-8201. (doi:10.1073/pnas.1110585109).
- 263 6. China's State Forestry Administration. 2009 *Survey of Key Terrestrial Wildlife Resources*  
 264 *in China*. pp. 1-348. Beijing, China Forestry Publishing House.

- 265 7. Fang X. 1990 *Natural foci of plague in China*. pp. 1-290. Beijing, People's Medical  
266 Publishing House.
- 267 8. Wang Y., Liu Q., Cong X., Xu C., Li Y. 2007 Plague reservoirs and their classification in  
268 natural foci of China. *Chin J Vector Biol Control* **18**(2), 127-133.
- 269 9. Qin C., Xu L., Zhang R., Liu Q., Li G., Fang X. 2012 Ecological-geographic landscapes  
270 of natural plague loci in China V. Biological characteristics of major natural reservoirs of *Yersinia*  
271 *pestis*. *Chin J Epidemiol* **33**(8), 692-697.
- 272 10. Wu L., Chen Y.H., Pollitzer R., Wu C.Y. 1936 *Plague: a Manual for Medical and Public*  
273 *Health Workers*. pp. 1-421. Shanghai, Weishengshu National Quarantine Service.
- 274 11. Li C., Zheng Y., Wang H., Wang Z., Wang L., Wei S., Cui B., Wang G., Chen H., Qi Z.,  
275 et al. 2009 Investigation on the space structure of plague natural foci in the Sanjiangyuan area in  
276 Qinghai Province. *Chin J Endemiol* **28**(5), 522-526.
- 277 12. Ping C. 2013 Analysis of plague monitoring results in Lhasa, Tibet during 1988 and  
278 2011. *Chin J Endemiol* **32**(4), 452-452.
- 279 13. Liu Y. 2000 *The atlas of plague and its environment in the People's Republic of China*.  
280 pp. 48-79. Beijing, Science press.
- 281 14. Porta M. 2014 *Dictionary of epidemiology*. pp. 245-252. Oxford, England, Oxford  
282 University Press.
- 283 15. Fisher R.A. 1922 On the Interpretation of  $\chi^2$  from Contingency Tables, and the  
284 Calculation of P. *J R Stat Soc Series B Stat Methodol* **85**(1), 87-94. (doi:10.2307/2340521).
- 285 16. Wang J., Jin F., Mo H., Wang F. 2009 Spatiotemporal evolution of China's railway  
286 network in the 20th century: An accessibility approach. *Transp Res A Policy Pract* **43**(8), 765-  
287 778. (doi:10.1016/j.tra.2009.07.003).
- 288 17. Yang J., Li Q., Qiu Z. 1946 *Map of China*. p. 5. Shanghai, Huancheng Press.
- 289 18. Committee of history of road in ancient China. 1994 *History of Road in Ancient China*.  
290 Beijing, China Communications Press.
- 291 19. Hu H. 1935 The Distribution of Population in China, with Statistics and Maps. *Acta*  
292 *Geogr Sin* **15**(2), 33-74.
- 293 20. Yang Q., Yan K. 2007 *Animal Color Map in China*. pp. 1-331. Beijing, Science Press.
- 294 21. Pan Q., Wang Y., Yan K. 2007 *Color Atlas of Chinese Mammals*. pp. 1-420. Beijing,  
295 China Forestry Publishing House.

296

297
